# Supplementary material
Source: PubMed Central journal article supplement (PMC9147702)

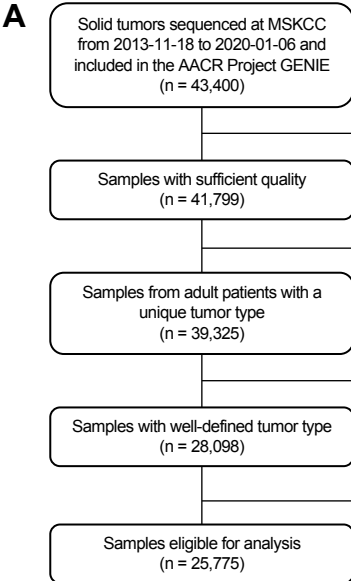

- 1,601 samples excluded based on:
  - Unavailable matched normal
  - Low sequencing coverage (<100x)
  - Low tumor purity (absence of somatic alterations including silent)
- 2,474 samples excluded based on:
  - Pediatric status of patients (<18y)
  - Presence of >1 sequenced tumor type
- 11,227 samples excluded based on:
  - Cancer of unknown primary
  - Tumor types in which distant metastases are rare (Gliomas)
  - Unavailable breast cancer subtypes
  - Tumor type with small n (n < 80 and either primary n < 30 or metastasis n < 30)
- 2,323 samples excluded based on:
  - >1 sample per patient\*

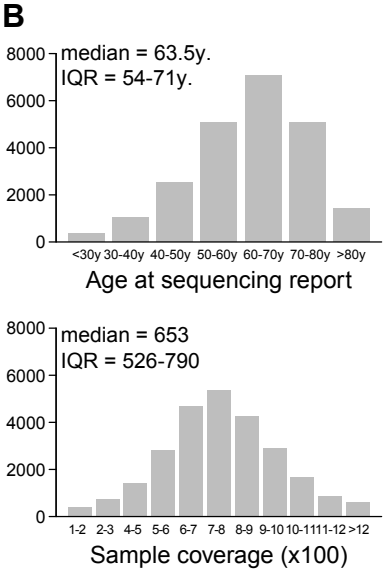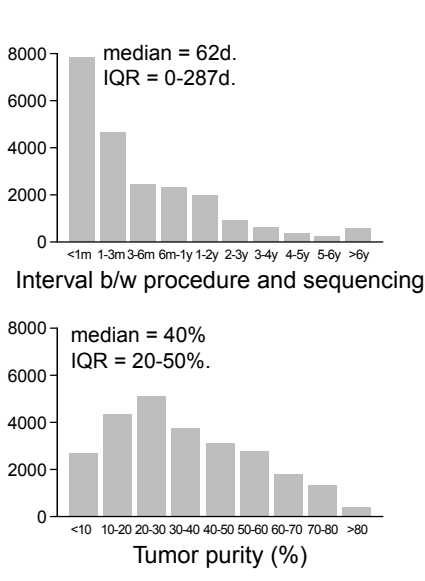

\*priority rules: the presence of a FACETS fit that passed qc > highest purity > highest sample coverage > most recent gene panel

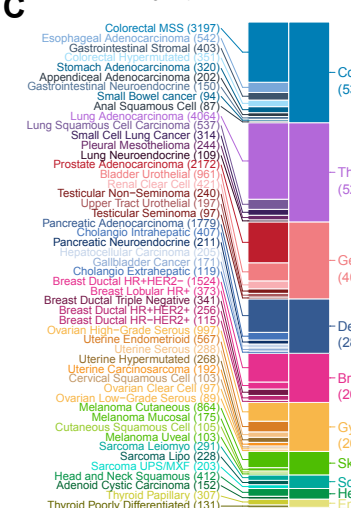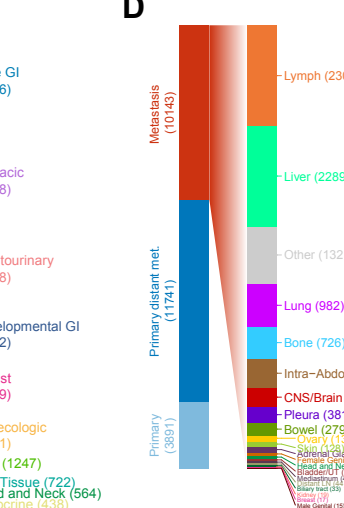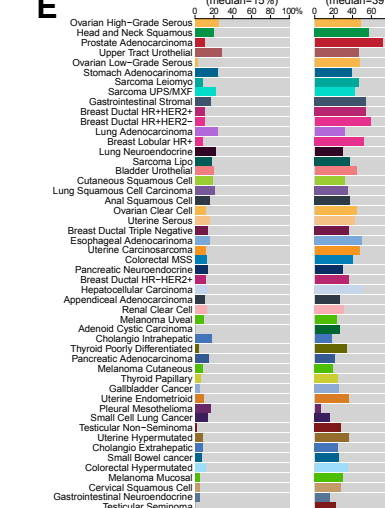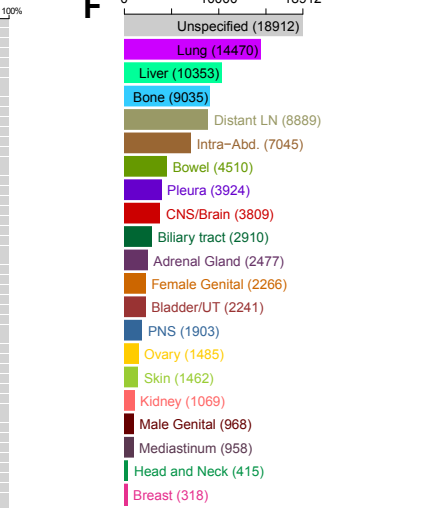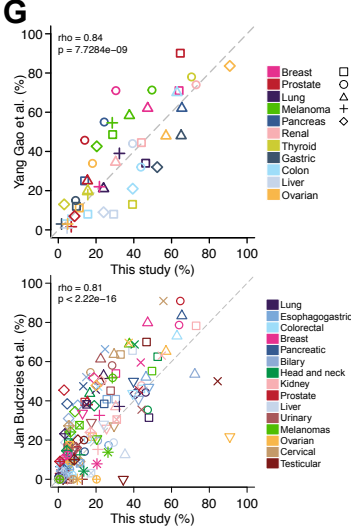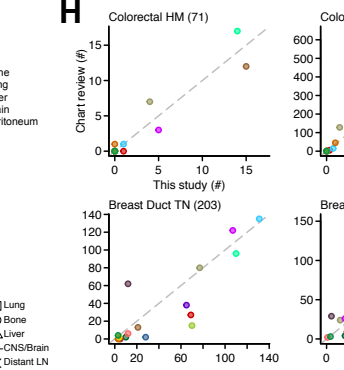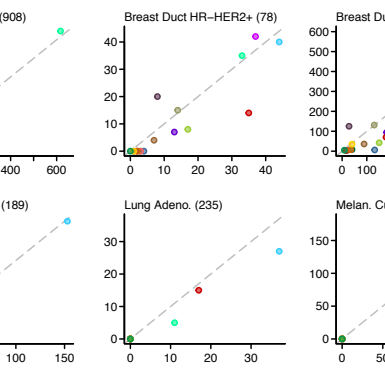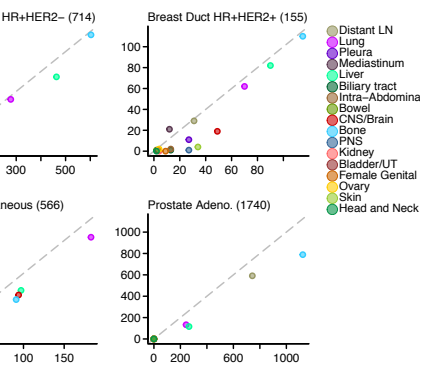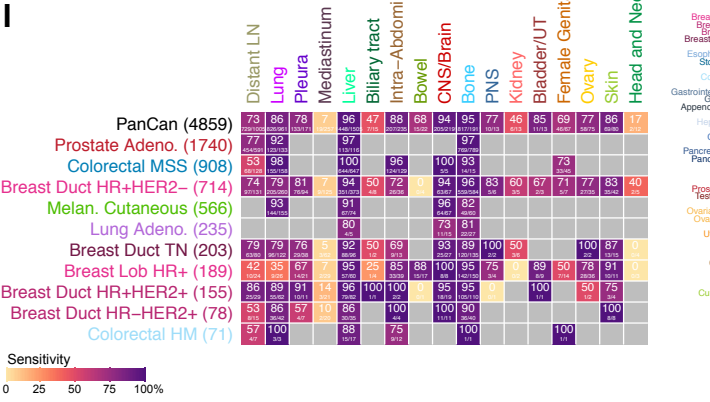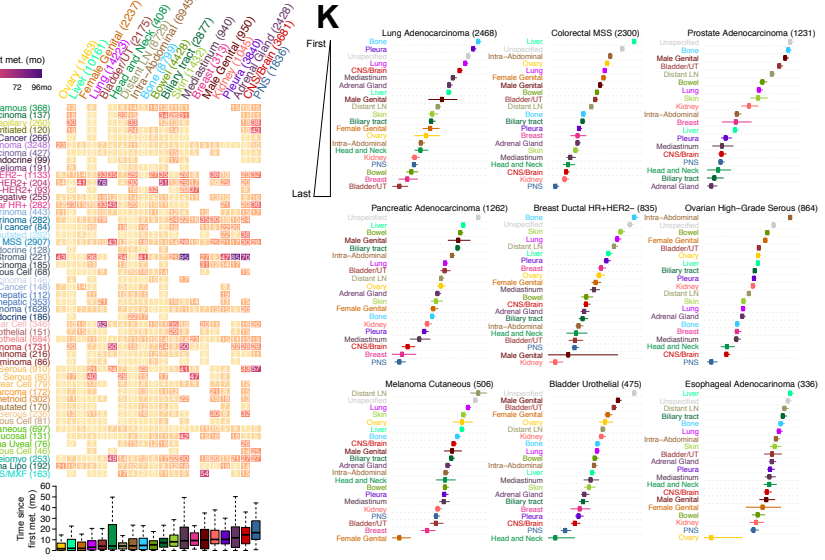

Supplement: NIHMS1774757-supplement-1.pdf [file NIHMS1774757-supplement-1.pdf]
