# Supplementary material
Source: PubMed Central journal article supplement (PMC9147702)

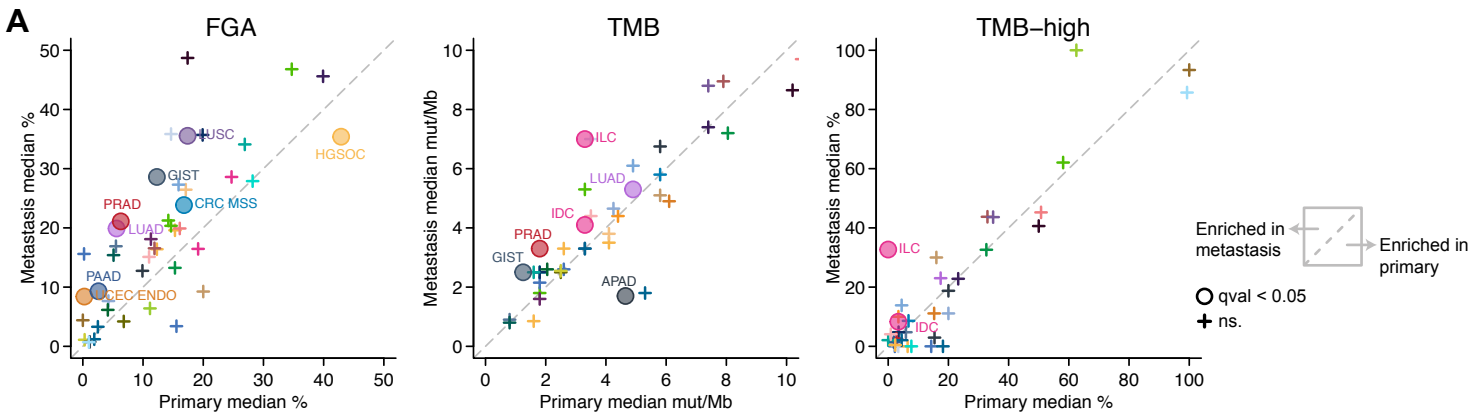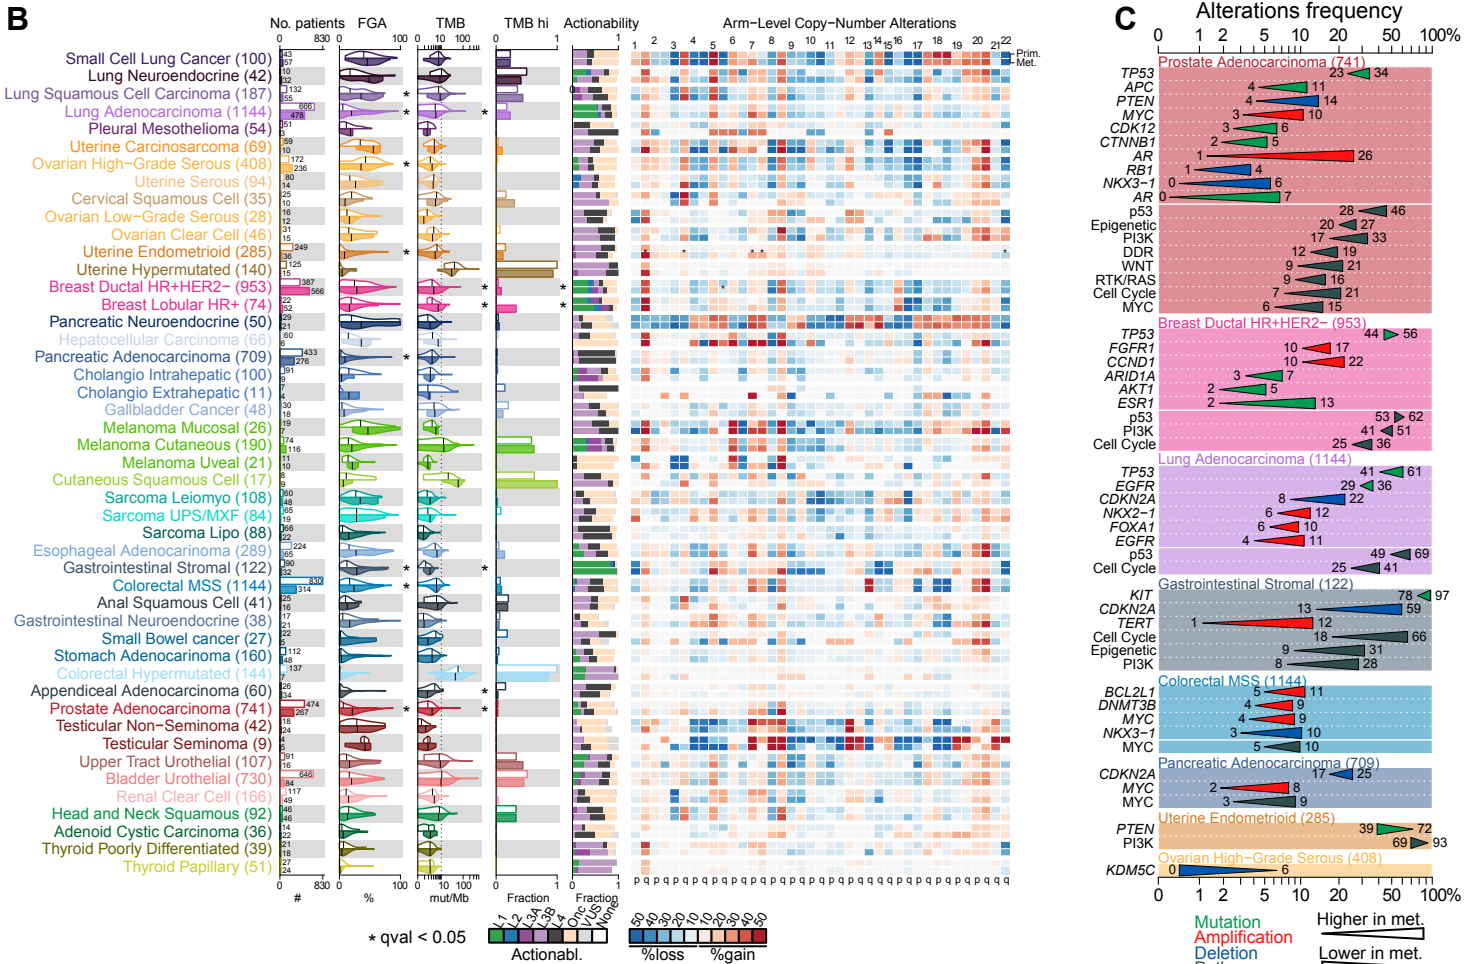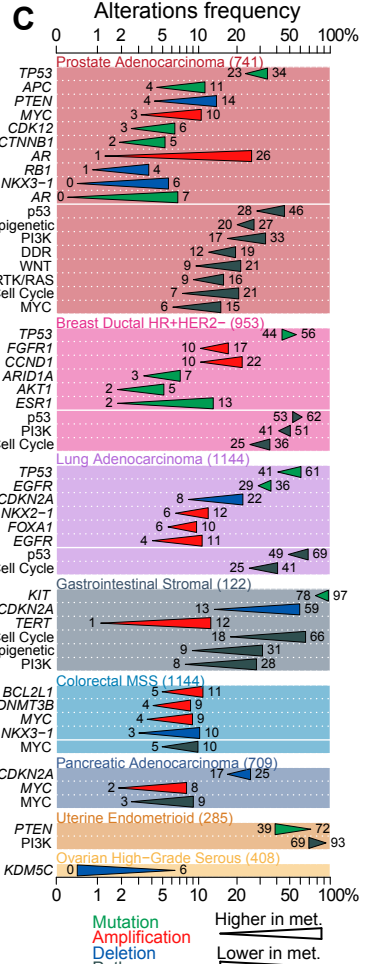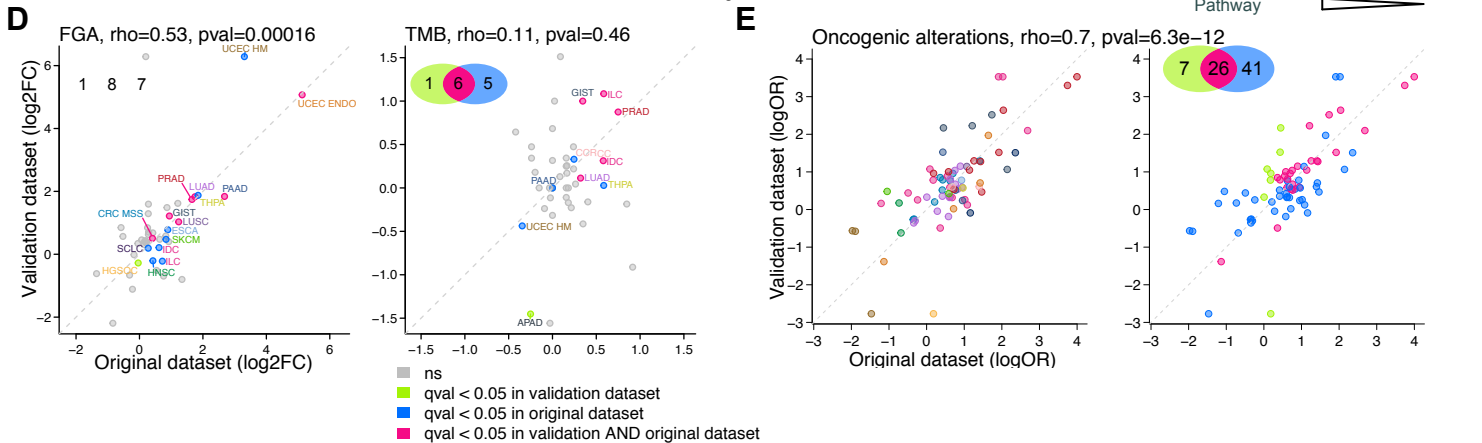

Supplement: NIHMS1774757-supplement-2.pdf [file NIHMS1774757-supplement-2.pdf]

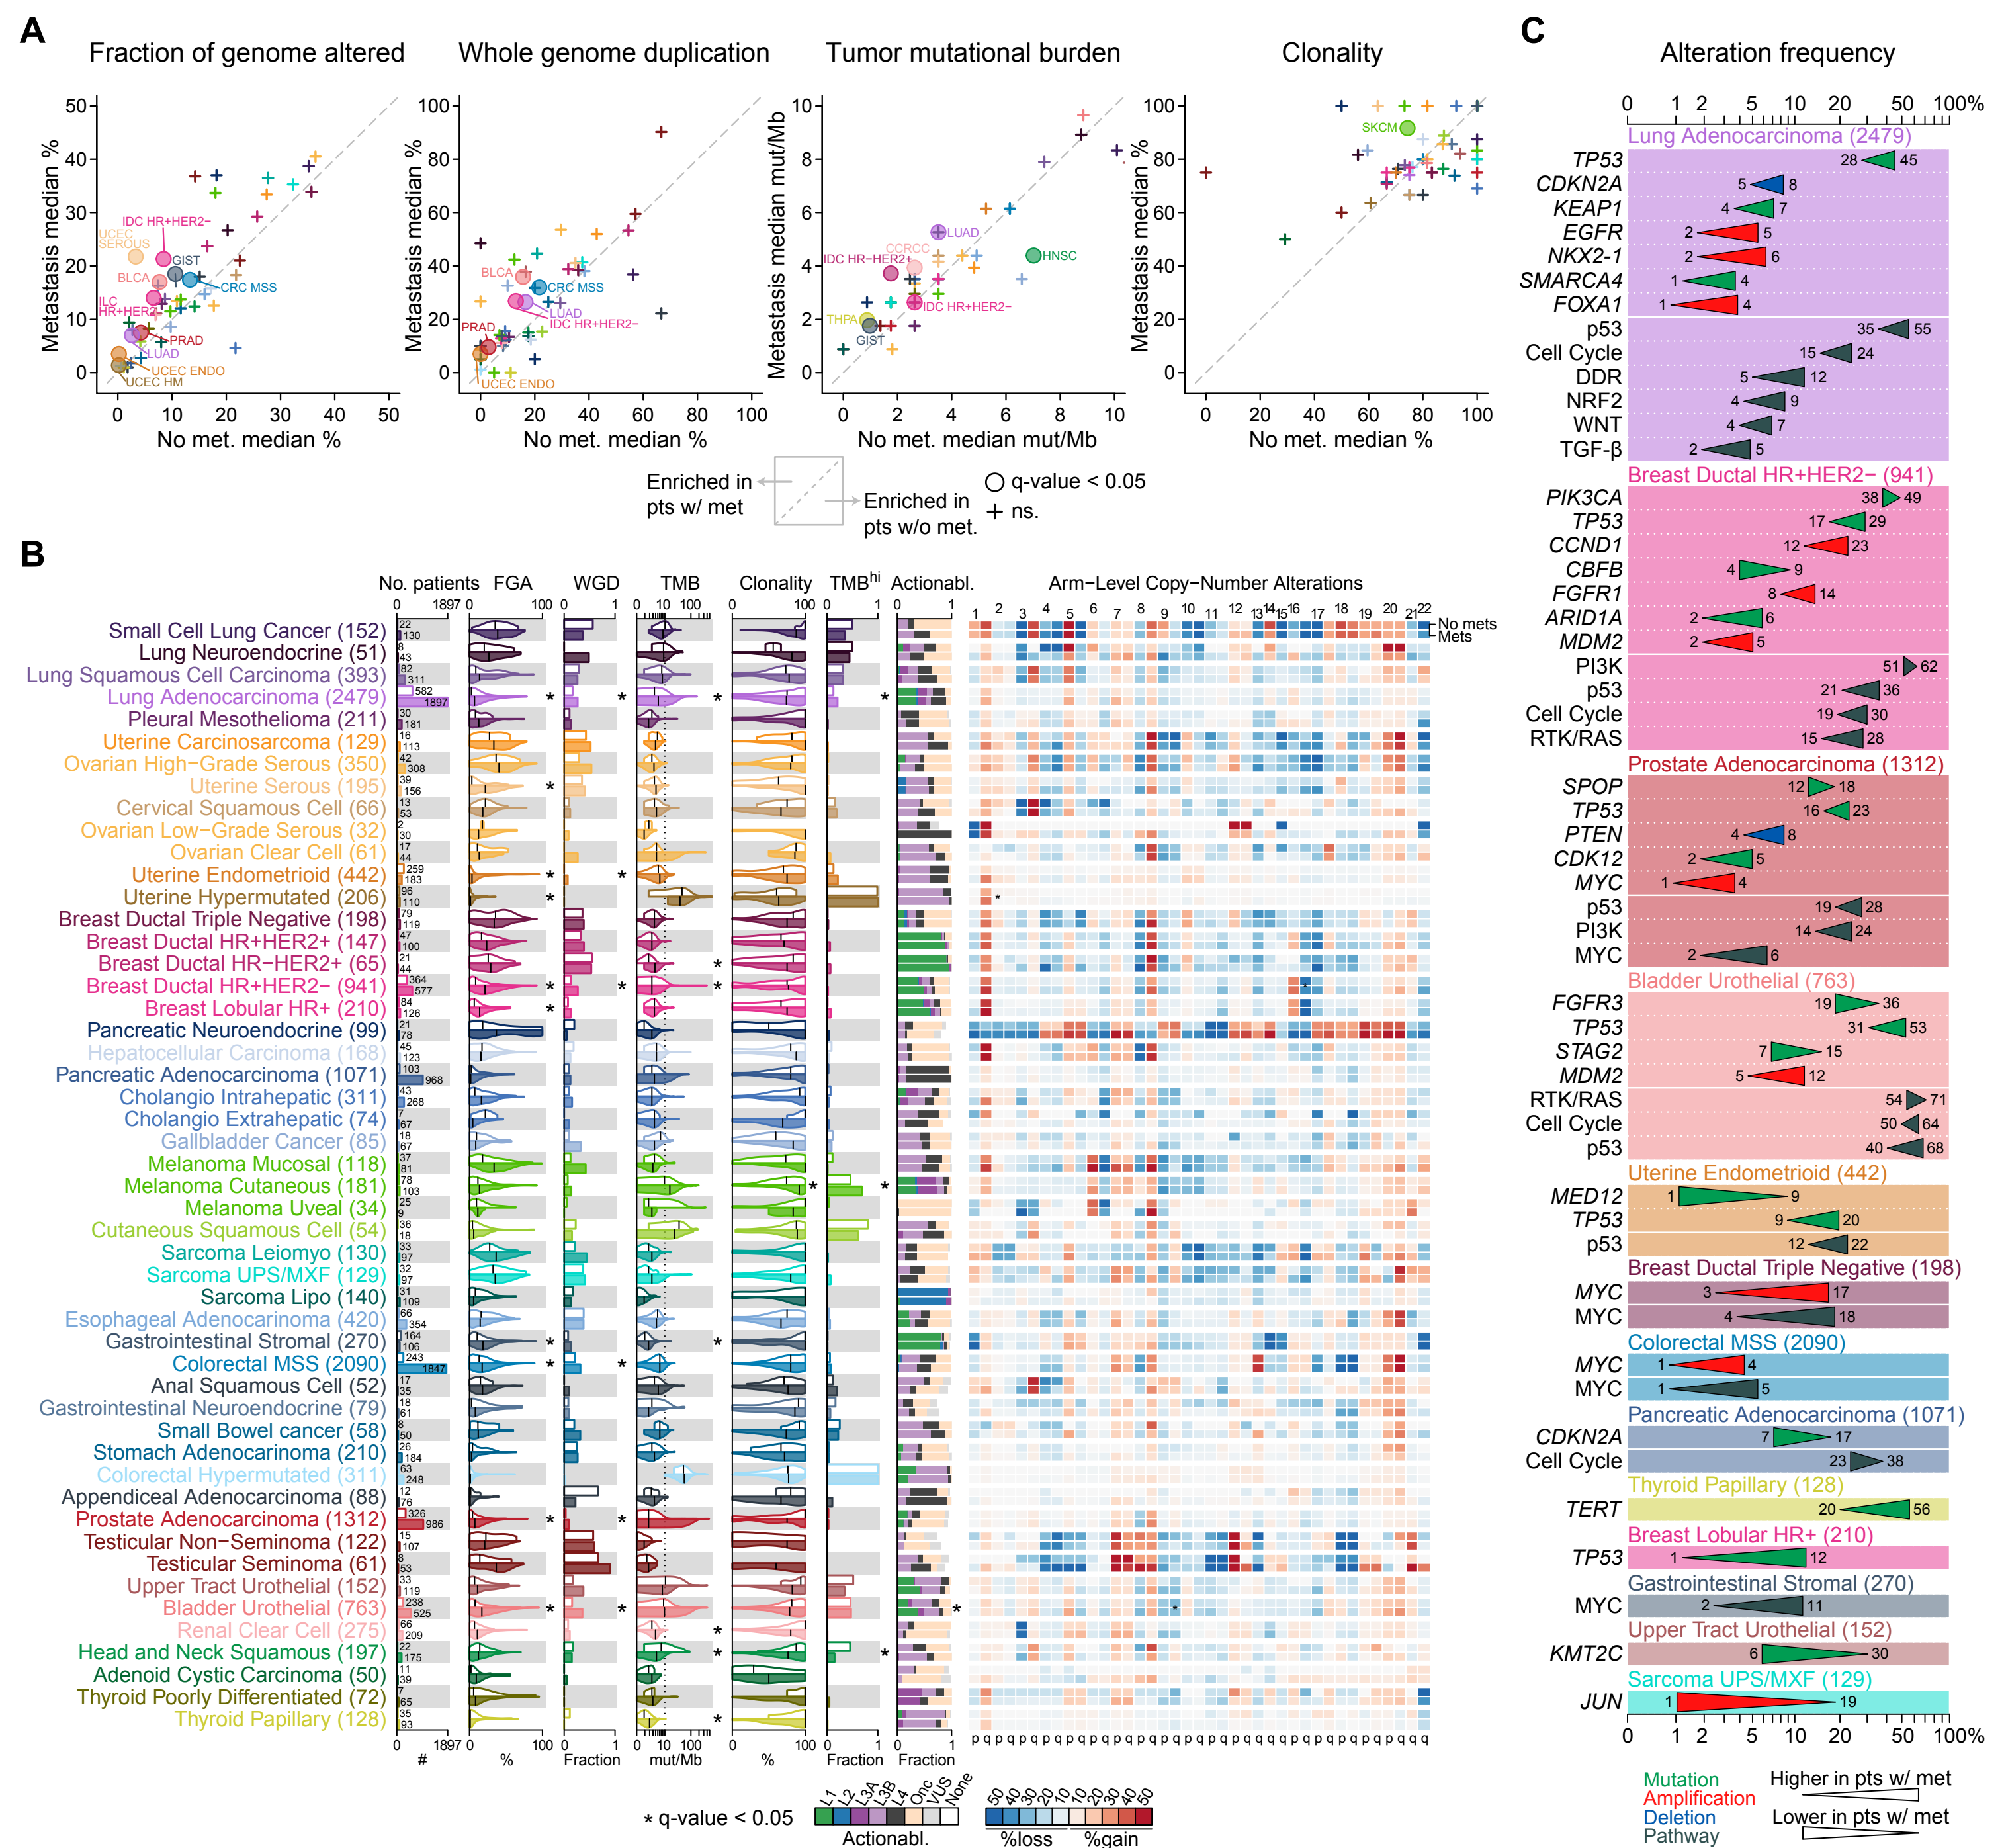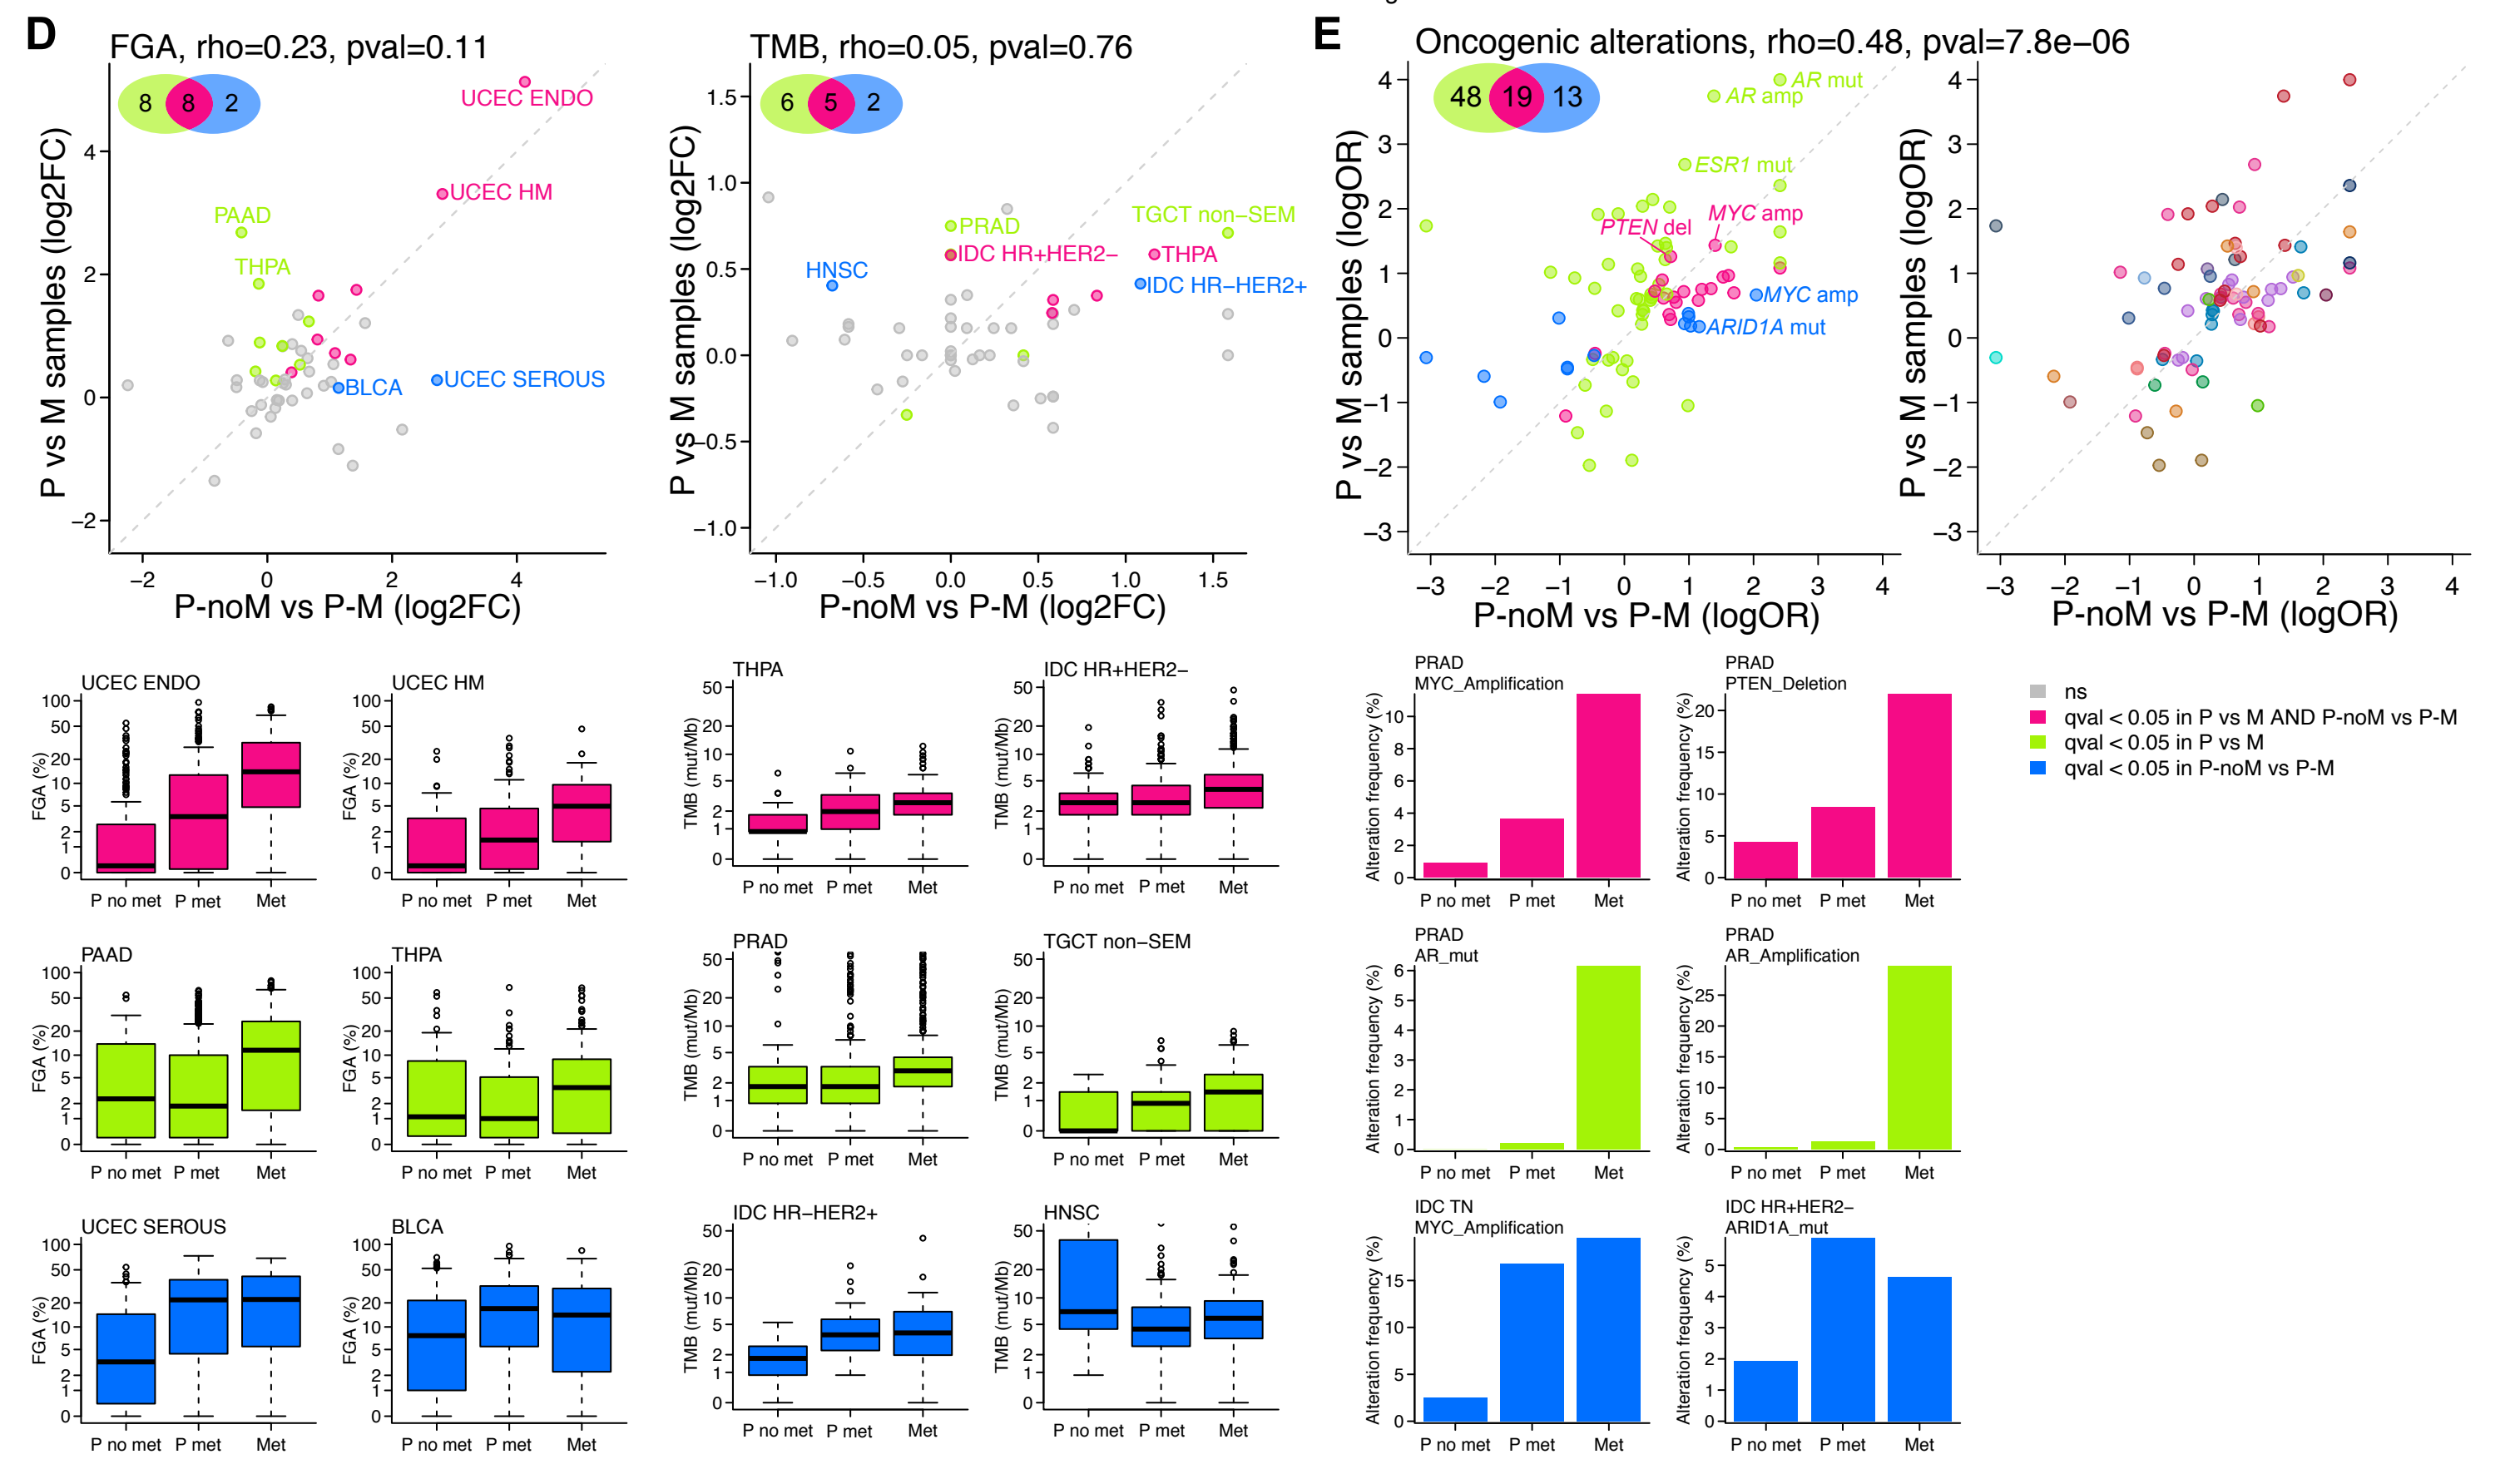

Supplement: NIHMS1774757-supplement-3.pdf [file NIHMS1774757-supplement-3.pdf]

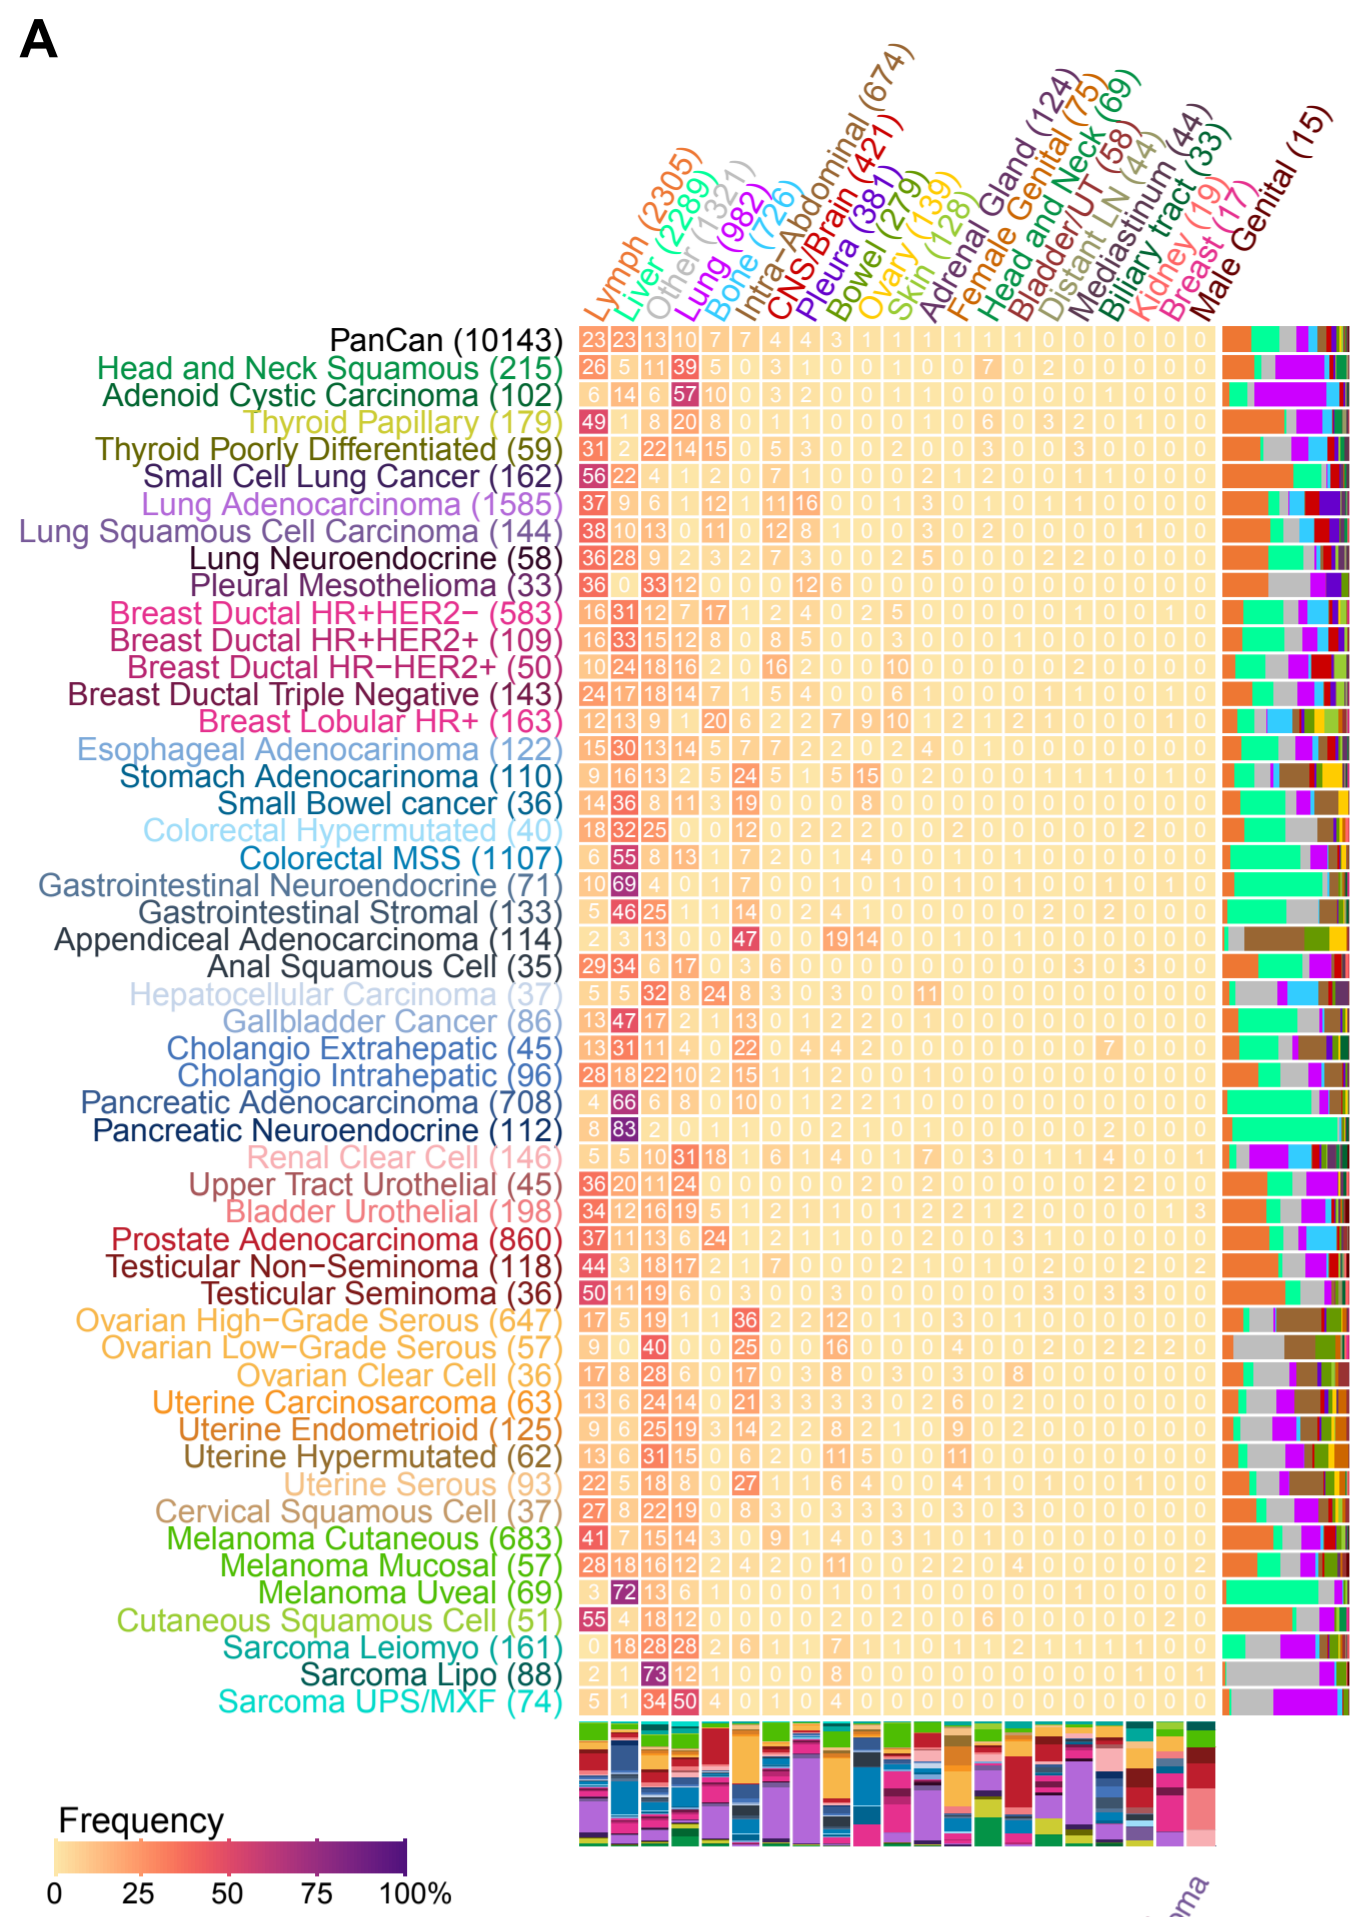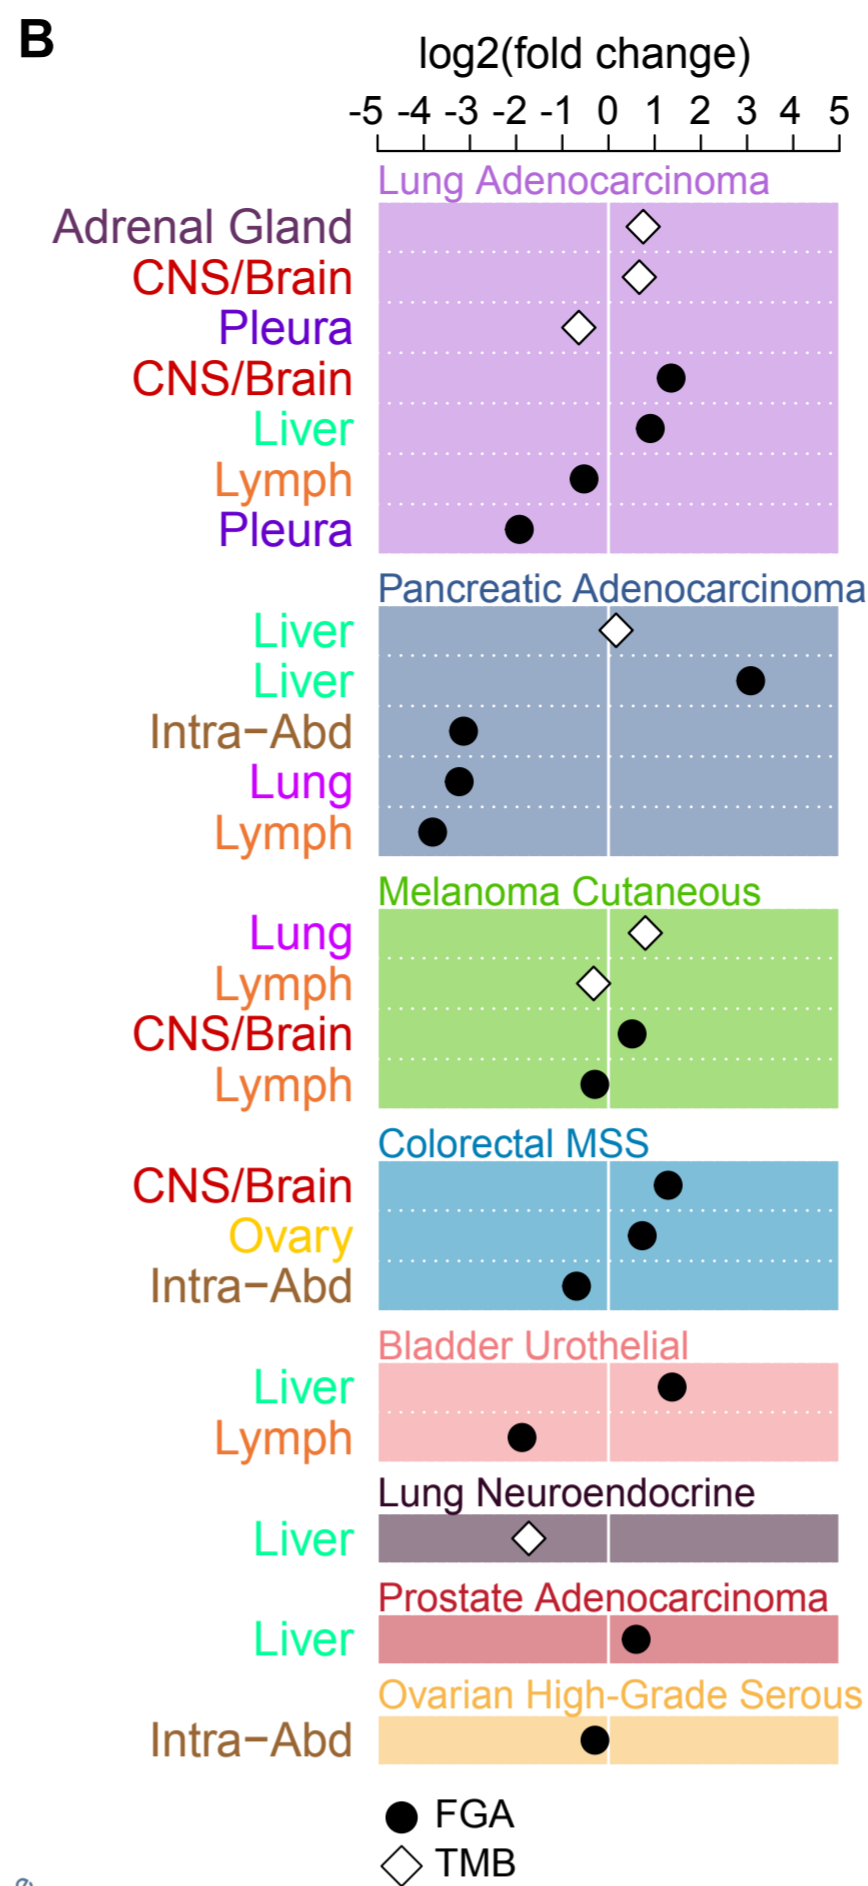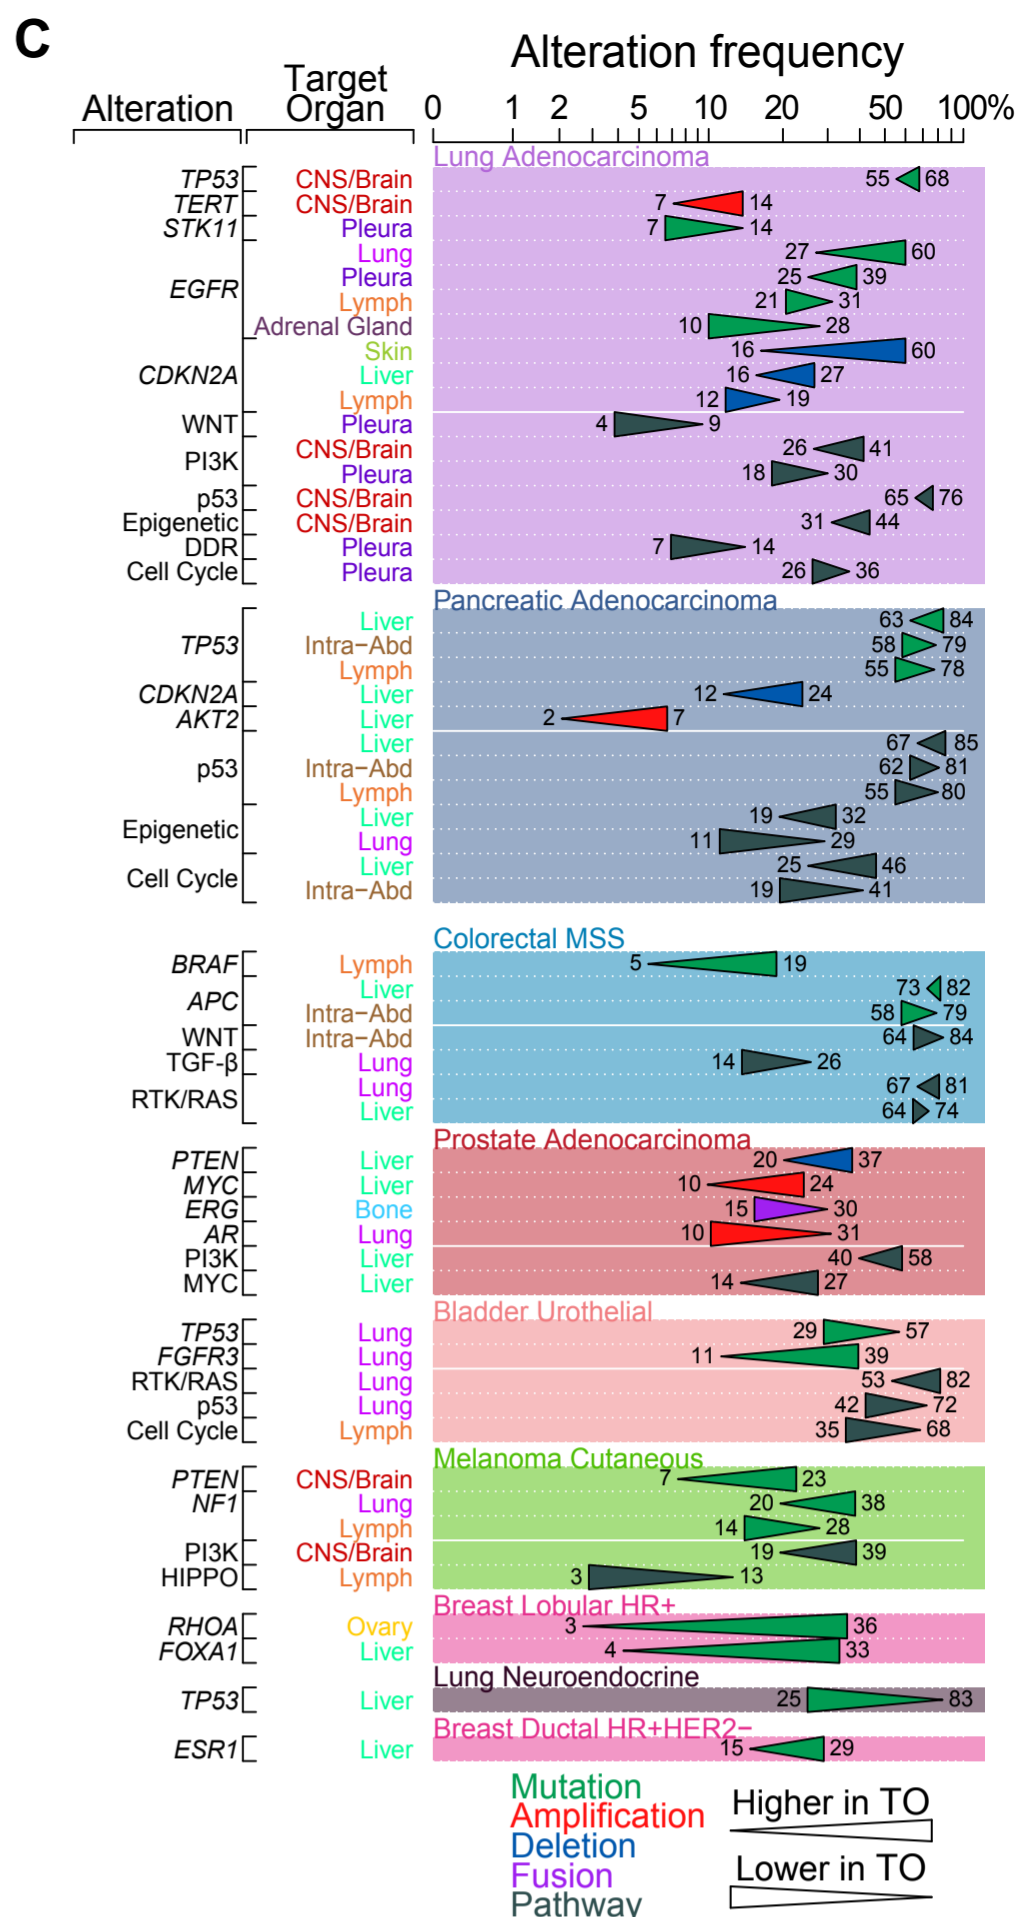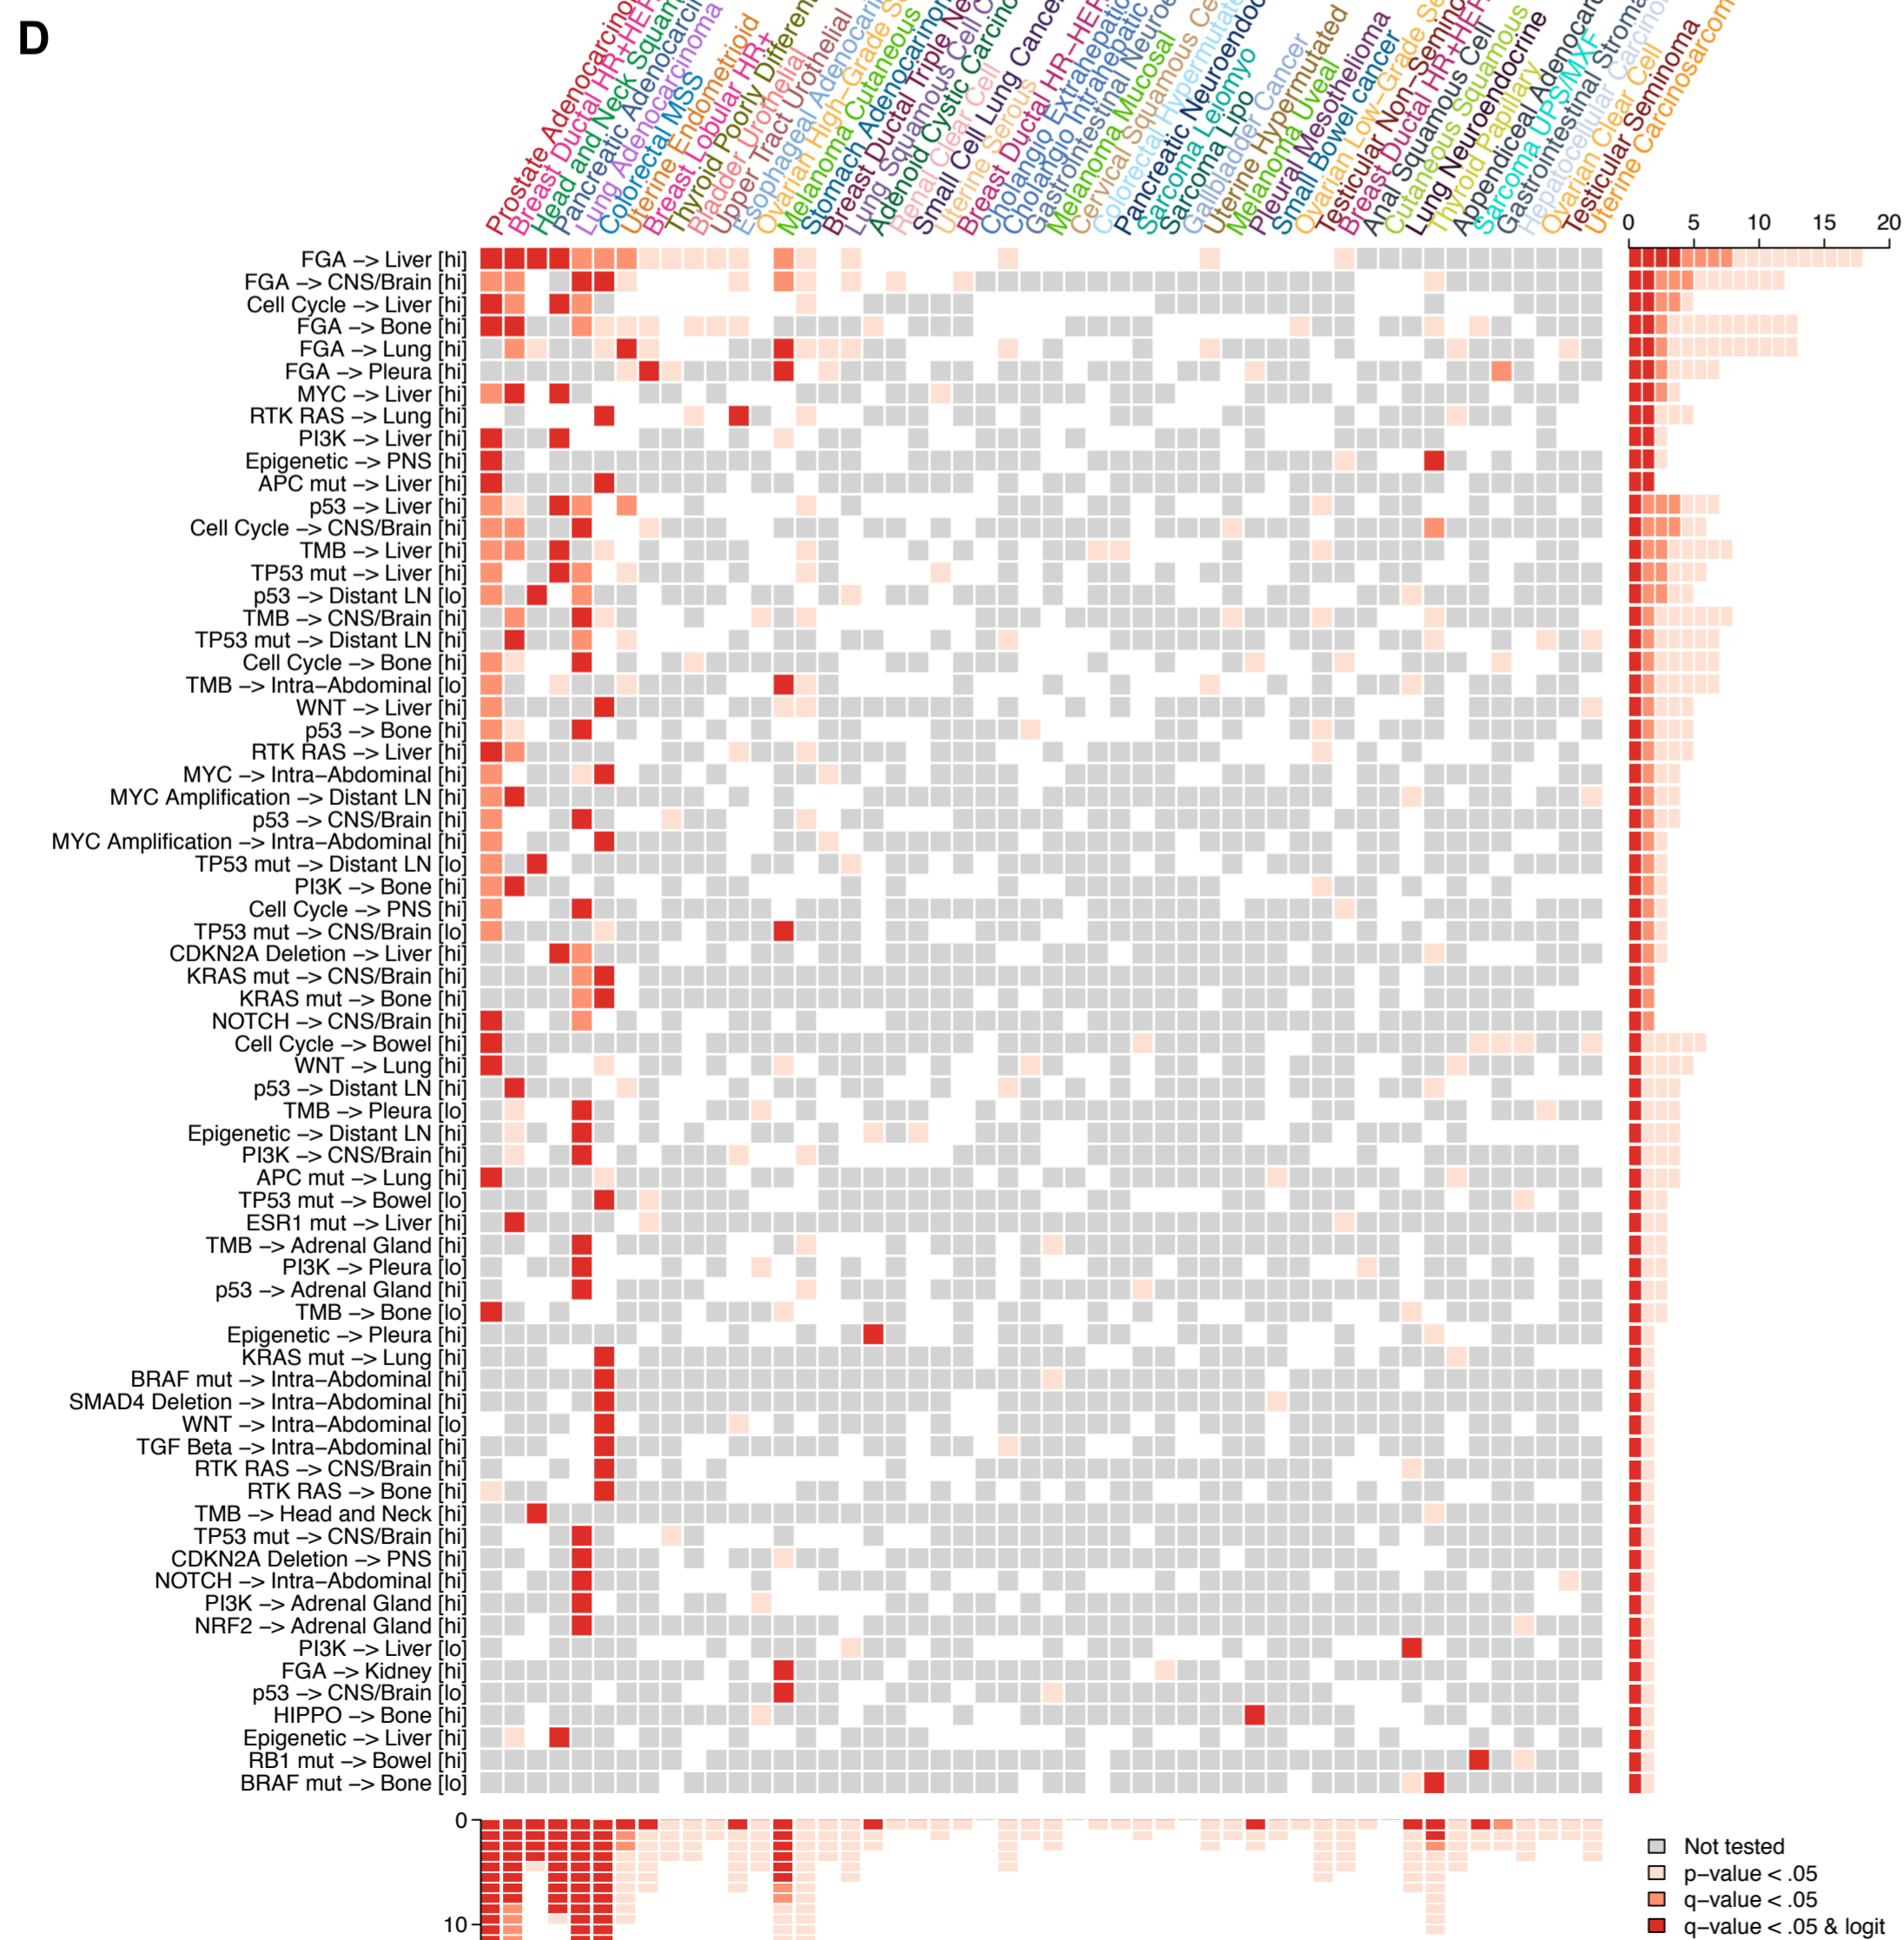

Supplement: NIHMS1774757-supplement-4.pdf [file NIHMS1774757-supplement-4.pdf]
